# Supplementary material for: Land abandonment as driver of woody vegetation dynamics in Tamaulipan thornscrub at Northeastern Mexico
Source: PeerJ. 2023 May 22;11:e15438. doi: 10.7717/peerj.15438 (PMC10211364; doi:10.7717/peerj.15438)
Supplement: Supplemental Information 2 — These are two datasets used for calculations of effective species indices and similarity indices. [file peerj-11-15438-s002.xlsx]

## Sheet: Diversity
Years of abandonment	B. myricifolia	C. boissieri	C. erecta	C. hookeri	C. mexicana	C. pallida	D. texana	E. ebano	E. polystachya	F. angustifolia	G. angustifolium	H. pallens	H. parvifolia	K. spinosa	L. frutescens	M. monancistra	P. aculeata	P. laevigata	P. texana	R. rhagocarpa	R.obcordata	S. celastrinum	V. amentacea	V. farnesiana	V. rigidula	Y. filifera	Z. fagara
>30	1	119	3	33	0	18	275	20	35	3	4	278	20	0	1	0	0	13	20	2	0	50	138	100	0	3	34
10	0	0	0	0	0	0	0	0	0	0	0	6	0	0	0	0	0	0	0	0	0	0	45	906	0	0	3
20	0	13	0	0	15	19	0	3	0	10	1	18	2	0	0	1	0	55	0	0	3	5	0	596	0	0	0
30	0	3	17	0	0	11	29	0	0	0	0	0	0	6	0	0	13	58	20	0	0	18	0	294	5	0	14

## Sheet: Similarity
PlantSpecies	10yr	20yr	30yr	>30yr
B. myricifolia	0	0	0	1
C. boissieri	0	13	3	119
C. erecta	0	0	17	3
C. hookeri	0	0	0	33
C. mexicana	0	15	0	0
C. pallida	0	19	11	18
D. texana	0	0	29	275
E. ebano	0	3	0	20
E. polystachya	0	0	0	35
F. angustifolia	0	10	0	3
G. angustifolium	0	1	0	4
H. pallens	6	18	0	278
H. parvifolia	0	2	0	20
K. spinosa	0	0	6	0
L. frutescens	0	0	0	1
M. monancistra	0	1	0	0
P. aculeata	0	0	13	0
P. laevigata	0	55	58	13
P. texana	0	0	20	20
R.obcordata	0	3	0	2
S. celastrinum	0	5	18	50
V. amentacea	45	0	0	138
V. farnesiana	906	596	294	100
V. rigidula	0	0	5	0
Y. filifera	0	0	0	3
Z. fagara	3	0	14	34
